# Supplementary material for: Soft-template synthesis of hydrophilic metallic zirconia nanoparticle-incorporated ordered mesoporous carbon composite and its application in phosphopeptide enrichment
Source: Royal Society of Chemistry journal article supplement (doi:10.1039/c6ra00326e), 2016-01-01
Supplement: c6ra00326e1.pdf [file c6ra00326e1.pdf]

## Electronic Supporting Information

### Soft-template Synthesis of Hydrophilic Metallic Zirconia Nanoparticles- Incorporated Ordered Mesoporous Carbon Composites and its Application in Phosphopeptides Enrichment

Lei zhang,<sup>a</sup> Zhichao Xiong,<sup>b</sup> Yajing Chen,<sup>a</sup> Li Peng,<sup>a</sup> Xiaodi Gao,<sup>a</sup> Bohao Yu,<sup>a</sup> Runsheng Zhang,<sup>c</sup>  
Lingyi zhang<sup>a\*</sup> and Weibing Zhang<sup>a\*</sup>

<sup>a</sup> Shanghai Key Laboratory of Functional Materials Chemistry, East China University of Science and  
Technology, 200237, Shanghai, China.

<sup>b</sup> Shanghai Institute of Ceramics, Chinese Academy of Sciences, Shanghai, 200050, P.R.China

<sup>c</sup> Shanghai Key Laboratory of Crime Scene Evidence, Shanghai Research Institute of Criminal Science  
and Technology, Shanghai Public Security Bureau, Shanghai, P. R. China

*weibingzhang@ecust.edu.cn*

*zhanglingyi@ecust.edu.cn*

### Contents

|                                                                                                                                     |   |
|-------------------------------------------------------------------------------------------------------------------------------------|---|
| Effect of incubation condition on the enrichment of phosphopeptides-----                                                            | 2 |
| Figure S1. Selected Area Electron Diffraction of TEM of zirconia/OMC composites--<br>-----                                          | 2 |
| Figure S2. Ultrahigh Resolution Field Emission Scanning Electron Microscopy<br>(UHRFESEM) of zirconia/OMC composites-----           | 3 |
| Figure S3. The effect of incubation condition on the enrichment of phosphopeptides---<br>-----                                      | 3 |
| Figure S4. The fourth enrichment of phosphopeptides by zirconia/OMC composites<br>which were stored in water about six months ----- | 4 |
| Table S1. The effect of incubation condition on three peaks of the enrichment of<br>phosphopeptides-----                            | 4 |
| Table S2. Phosphopeptides identified of $\beta$ -casein after enriched by zirconia/OMC<br>composites -----                          | 5 |

Table S3. Phosphopeptides identified of nonfat milk after enriched by zirconia/OMC composites -----5

Table S4. Identified phosphopeptides from nonfat milk enriched by Zirconia/OMC or other materials cited from the literatures using MAIDI-TOF MS-----6

*Effect of incubation condition on the enrichment of phosphopeptides*

In order to improve the enrichment efficiency of phosphopeptides, different incubation conditions were studied. Six different loading buffers were used to enrich the tryptic digests of  $\beta$ -casein. The three MS peaks of phosphopeptides (2061.72 m/z, 2555.96 m/z, 3122.09 m/z) were used to evaluate the enrichment results. As shown in Fig. S3 ESI  $\dagger$  and Table S1 ESI  $\dagger$ , the MS signal intensities of three MS peaks were gradually increased with the enlargement of the ratio of acetonitrile. When the content of TFA was increased, the intensities were reduced. So, the best load buffer condition was ACN-H<sub>2</sub>O-TFA (90 : 5: 5, v/v/v).

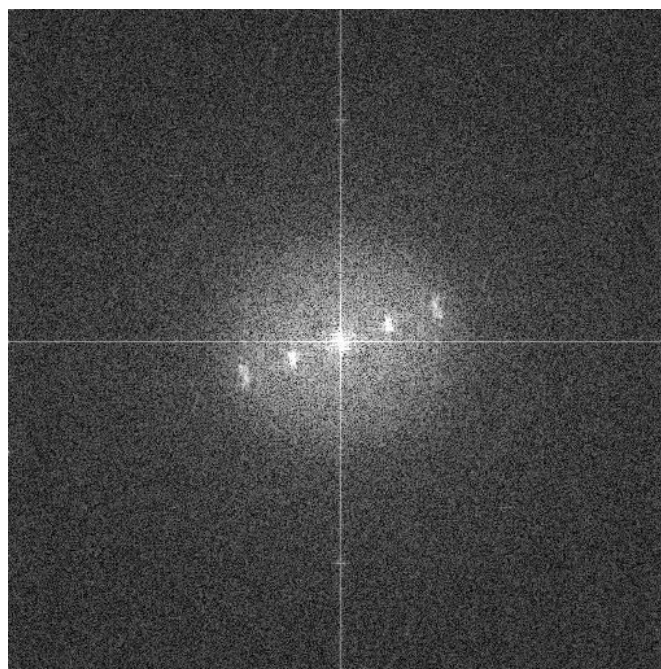

**Figure S1.** Selected Area Electron Diffraction of TEM of zirconia/OMC composites

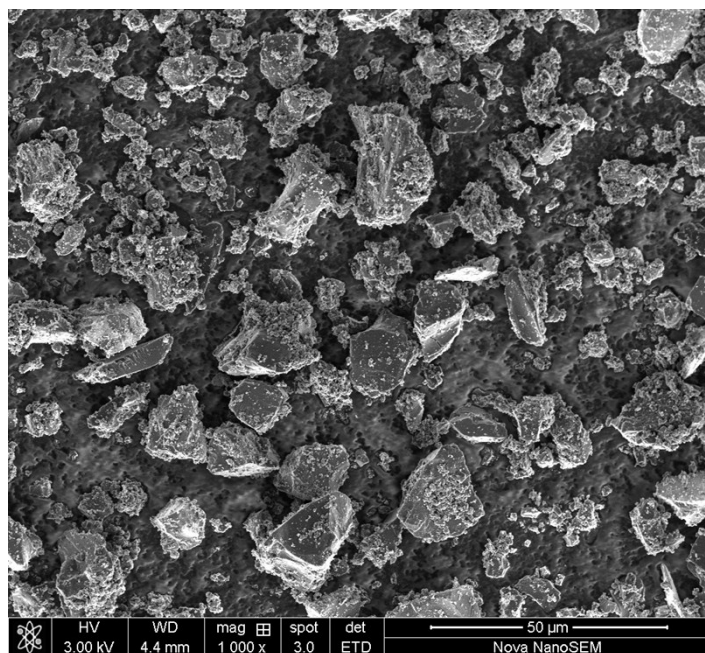

**Figure S2.** Ultrahigh Resolution Field Emission Scanning Electron Microscopy (UHRFESEM) of zirconia/OMC composites

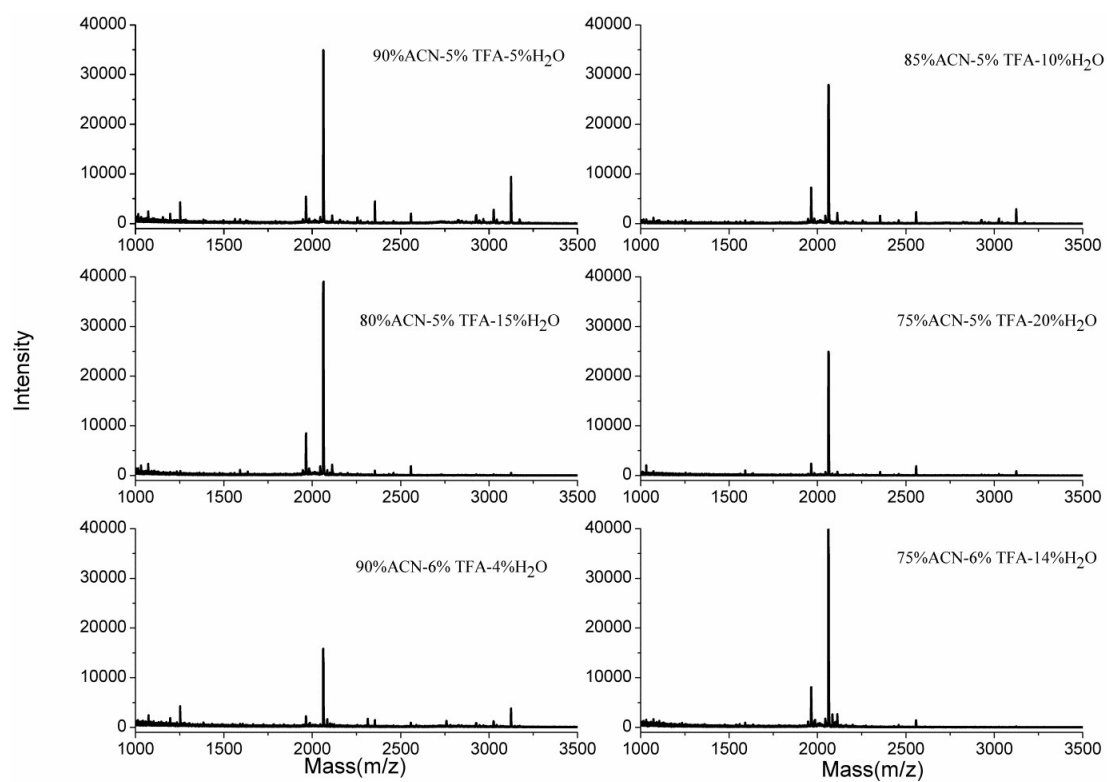

**Figure S3.** The effect of incubation condition on the enrichment of phosphopeptides

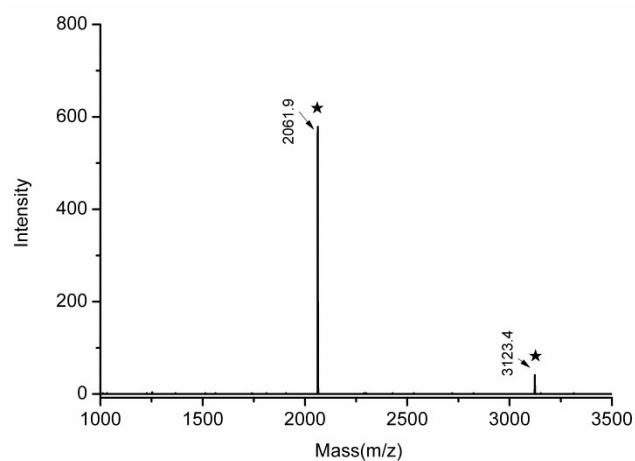

**Figure S4.** The fourth enrichment of phosphopeptides by zirconia/OMC composites which were stored in water about six months

**Table S1.** The effect of incubation condition on three peaks of the enrichment of phosphopeptides

| Incubation condition                   | Peak of<br>2061.72 m/z | Peak of<br>2555.96 m/z | Peak of<br>3122.09 m/z |
|----------------------------------------|------------------------|------------------------|------------------------|
| 90 % ACN-5 % TFA-5 % H <sub>2</sub> O  | 35112                  | 2077                   | 9380                   |
| 85 % ACN-5 % TFA-10 % H <sub>2</sub> O | 27996                  | 3202                   | 2929                   |
| 80 % ACN-5 % TFA-15 % H <sub>2</sub> O | 38971                  | 1884                   | 594                    |
| 75 % ACN-5 % TFA-20 % H <sub>2</sub> O | 25033                  | 1868                   | 818                    |
| 90 % ACN-6 % TFA-4 % H <sub>2</sub> O  | 12587                  | 967                    | 3821                   |
| 75 % ACN-6 % TFA-14 % H <sub>2</sub> O | 4008                   | 1394                   | 2128                   |

**Table S2.** Phosphopeptides identified in tryptic digests of  $\beta$ -casein after enriched by metallic zirconia incorporated Ordered Mesoporous Carbon

| No. | Protein                      | Peptide sequence                      | Number of phosphoryl groups | Observed m/z |
|-----|------------------------------|---------------------------------------|-----------------------------|--------------|
| 1   | $\beta$ -casein              | FQ[pS]EEQQQTEDELQDK                   | 1                           | 2061.72      |
| 2   | $\beta$ -casein              | FQ[pS]EEQQQTEDELQDKIHPF               | 1                           | 2555.96      |
| 3   | $\beta$ -casein              | RELEELNVPGEIVE[pS]L[pS][pS][pS]EESITR | 4                           | 3122.09      |
| 4   | $\beta$ -casein <sup>a</sup> | IEKFQ[pS]EEQQQTEDELQDK                | 1                           | 2353.39      |
| 5   | $\alpha$ -casein             | TVD[Mo]ME[pS]TEVF                     | 1                           | 1252.57      |

$\beta$ -casein<sup>a</sup> : dephosphopeptide of m/z : 2432.05

**Table S3.** Phosphopeptides identified in tryptic digests of proteins extracted from nonfat milk after enriched by metallic zirconia incorporated Ordered Mesoporous Carbon

| No. | Protein          | Peptide sequence                            | Number of phosphoryl groups | Observed m/z |
|-----|------------------|---------------------------------------------|-----------------------------|--------------|
| 1   | $\alpha$ -casein | TVD[Mo]ME[pS]TEVF                           | 1                           | 1252.57      |
| 2   | $\beta$ -casein  | FQSEEQQTEDELQDKIHPF                         | 1                           | 1277.57      |
| 3   | $\alpha$ -casein | TVD[Mo]E[pS]TEVFTK                          | 1                           | 1482.53      |
| 4   | $\alpha$ -casein | EQL[pS]T[pS]EENSCK                          | 2                           | 1539.49      |
| 5   | $\beta$ -casein  | RELEELNVPGEIVESLSSSEESI<br>TR               | 1                           | 1561.20      |
| 6   | $\alpha$ -casein | VPQLEIVPN[pS]AEER                           | 1                           | 1660.71      |
| 7   | $\alpha$ -casein | YLGEYLIVPN [pS]AEER                         | 1                           | 1831.56      |
| 8   | $\alpha$ -casein | DIG[pS]E[pS]TEDQAMEDIK                      | 2                           | 1927.59      |
| 9   | $\alpha$ -casein | DIG[pS]E[pS]TEDQA[Mo]EDIK                   | 2                           | 1943.58      |
| 10  | $\beta$ -casein  | FQ[pS]EEQQQTEDELQDK                         | 1                           | 2061.72      |
| 11  | $\alpha$ -casein | Q*MEAE[pS]I[pS][pS]<br>[pS]EEIVPN[pS]VEAQK  | 5                           | 2703.83      |
| 12  | $\alpha$ -casein | QMEAE[pS]I[pS][pS][pS]EEIVP<br>NPN[pS]VEQK  | 5                           | 2720.76      |
| 13  | $\alpha$ -casein | ELEELNVPGEIVE[pS]L[pS][pS]<br>[pS]EESITR    | 4                           | 2966.00      |
| 14  | $\alpha$ -casein | NANEEYSIG[pS][pS][pS]EE[pS]<br>S]AEVATEEVK  | 4                           | 3007.74      |
| 15  | $\beta$ -casein  | RELEELNVPGEIVE[pS]L[pS][pS]<br>S][pS]EESITR | 4                           | 3122.04      |

**Table S4.** Identified phosphopeptides from nonfat milk enriched by Zirconia/OMC or other materials cited from the literatures using MAIDI-TOF MS

| Materials                           | Detection limit | Selectivity<br>(ratios of $\beta$ -casein<br>and BSA) | Phospho<br>peptides<br>identified | Ref       |
|-------------------------------------|-----------------|-------------------------------------------------------|-----------------------------------|-----------|
| Zirconia/OMC                        | 1.5 fmol        | 1:300                                                 | 15                                | This work |
| ZrO <sub>2</sub> -MSN               | 2.5 fmol        | 1:100                                                 | 16                                | 1         |
| ZrO <sub>2</sub> -NP                | -               | -                                                     | 9                                 | 1         |
| $\alpha$ -ZrO <sub>2</sub> -NP      | 2 fmol          | -                                                     | 13                                | 2         |
| SiO <sub>2</sub> - ZrO <sub>2</sub> | -               | -                                                     | 14                                | 3         |

[1] X. L. Zhang, F. Wang, Y. Xia, *J. Chromatogr. A.*, 2013, **1306**, 20-26.

[2] S. K. Kailasa, H. F. Wu, *Anal. Bioanal. Chem.*, 2010, **396**, 1115-1125.

[3] H. H. Wan, J. Y. Yan, L. Yu, Q. Y. Sheng, X. L. Zhang, X. Y. Xue, X. L. Li, X. M. Liang, *Analyst*, 2011, **136**, 4422-4430.
